# Supplementary material
Source: publisher figshare collection journal article supplement (https://sage.figshare.com/ndownloader/files/17470628)
Supplement: Supplementary file 1 [file 17470628]

## Appendix 1

The interview questions were grouped in five categories, with questions aligned to each category.

| Category                                                         | Associated questions                                                                                                                                                                                                                          |
|------------------------------------------------------------------|-----------------------------------------------------------------------------------------------------------------------------------------------------------------------------------------------------------------------------------------------|
| <i>Diagnosis</i>                                                 | 1. Can you tell me what it was like when you found out your child was diagnosed with type 1 diabetes mellitus (T1DM)?<br>2. Can you describe to me the things that worried/concerned you the most?                                            |
| <i>Family, community and cultural response</i>                   | 3. What support did you receive from your extended family?<br>4. Can you tell me how your religion plays a part in the management of your child's diabetes?<br>5. Can you describe the impact your culture has on managing your child's T1DM? |
| <i>Education and support from your healthcare team</i>           | 6. What support did you feel you received from Sheikh Khalifa Medical City, SEHA?<br>7. What do you feel helped you the most?<br>8. How do you feel we could improve our service to mothers with children newly diagnosed with T1DM?          |
| <i>Day-to-day management issues</i>                              | 9. Can you describe a typical day?<br>10. What helps you to cope?<br>11. If your child is at nursery or school, how do you manage this?                                                                                                       |
| <i>Impact on parenting other children and home relationships</i> | 12. Can you explain to me the impact having a child with T1DM has on your family, other children and your parenting style?                                                                                                                    |
